# Supplementary material
Source: PubMed Central journal article supplement (PMC3370892)
Supplement: NIHMS256403-supplement-01.pdf [file NIHMS256403-supplement-01.pdf]

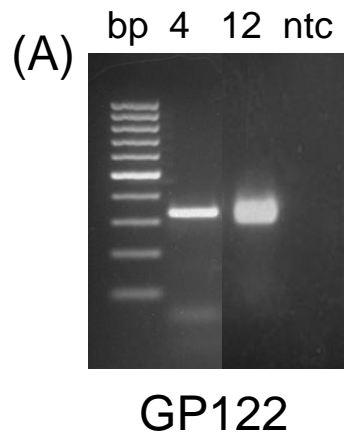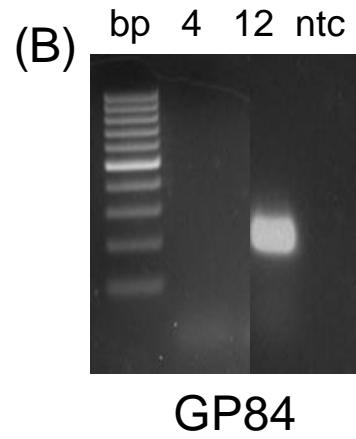

**Supplementary Figure S1**

# FLAG-tag GP84 expression plasmids

# pGP84 Cellular Location

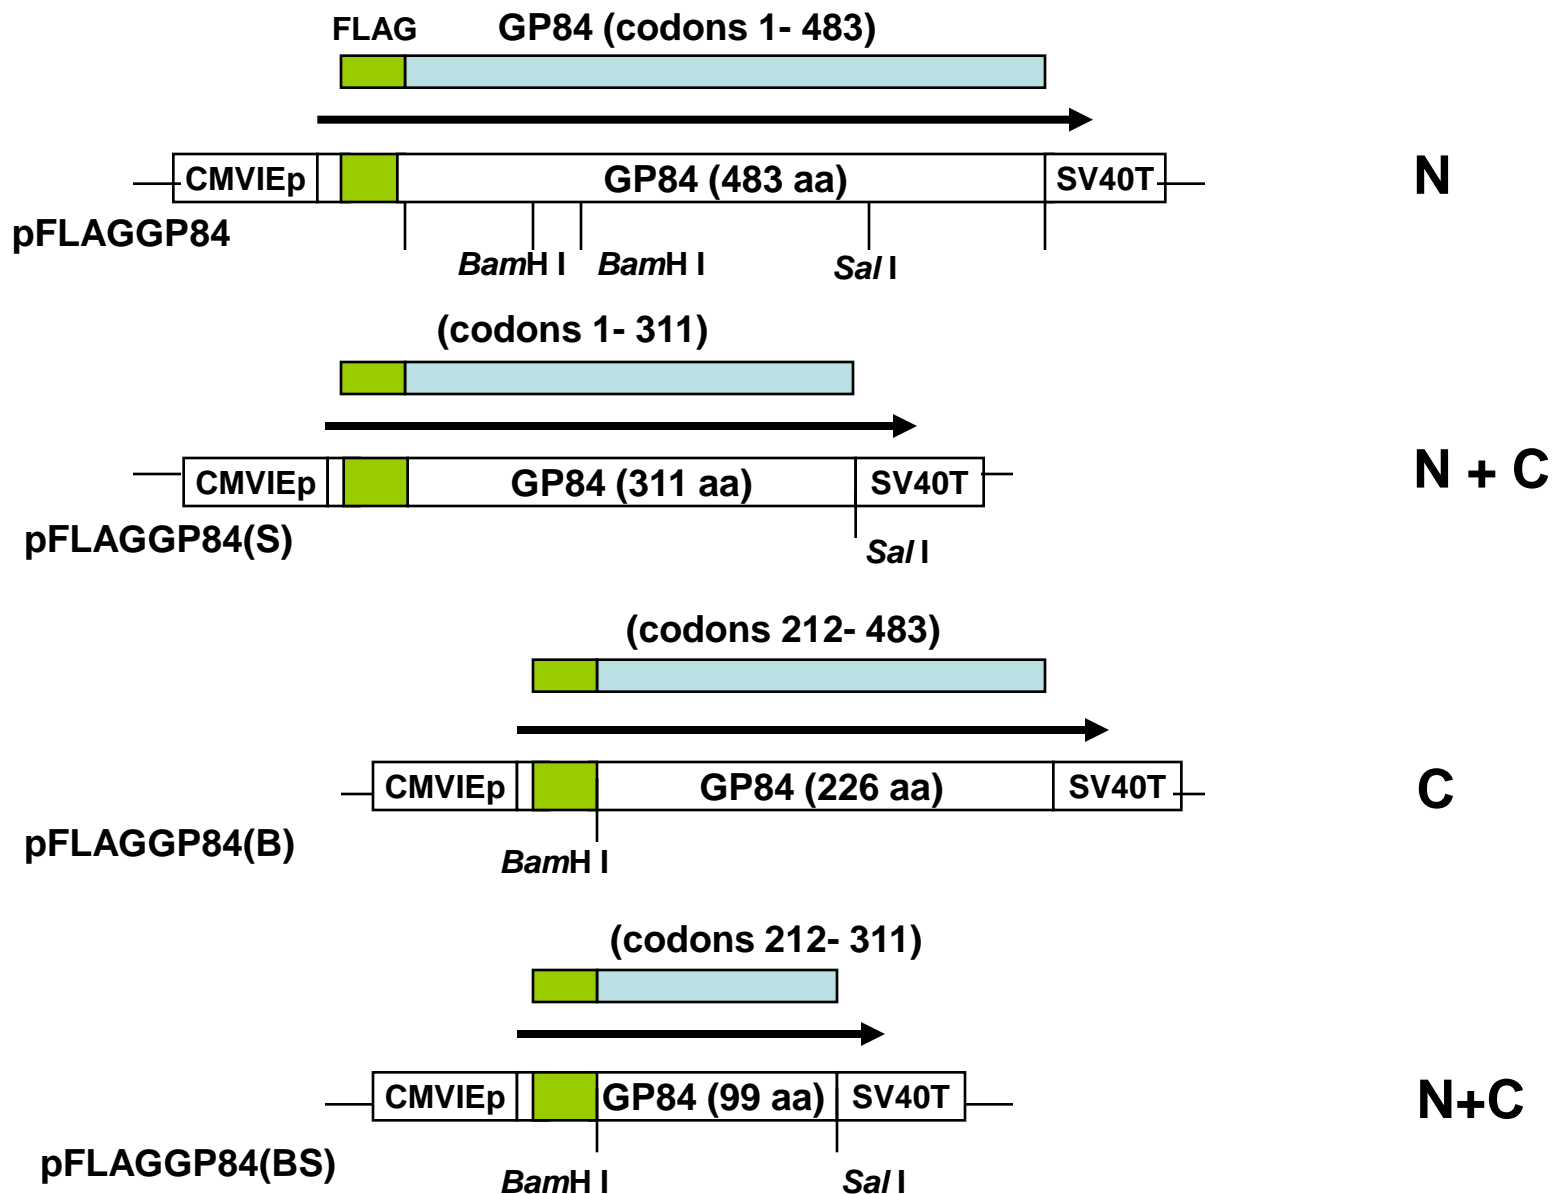

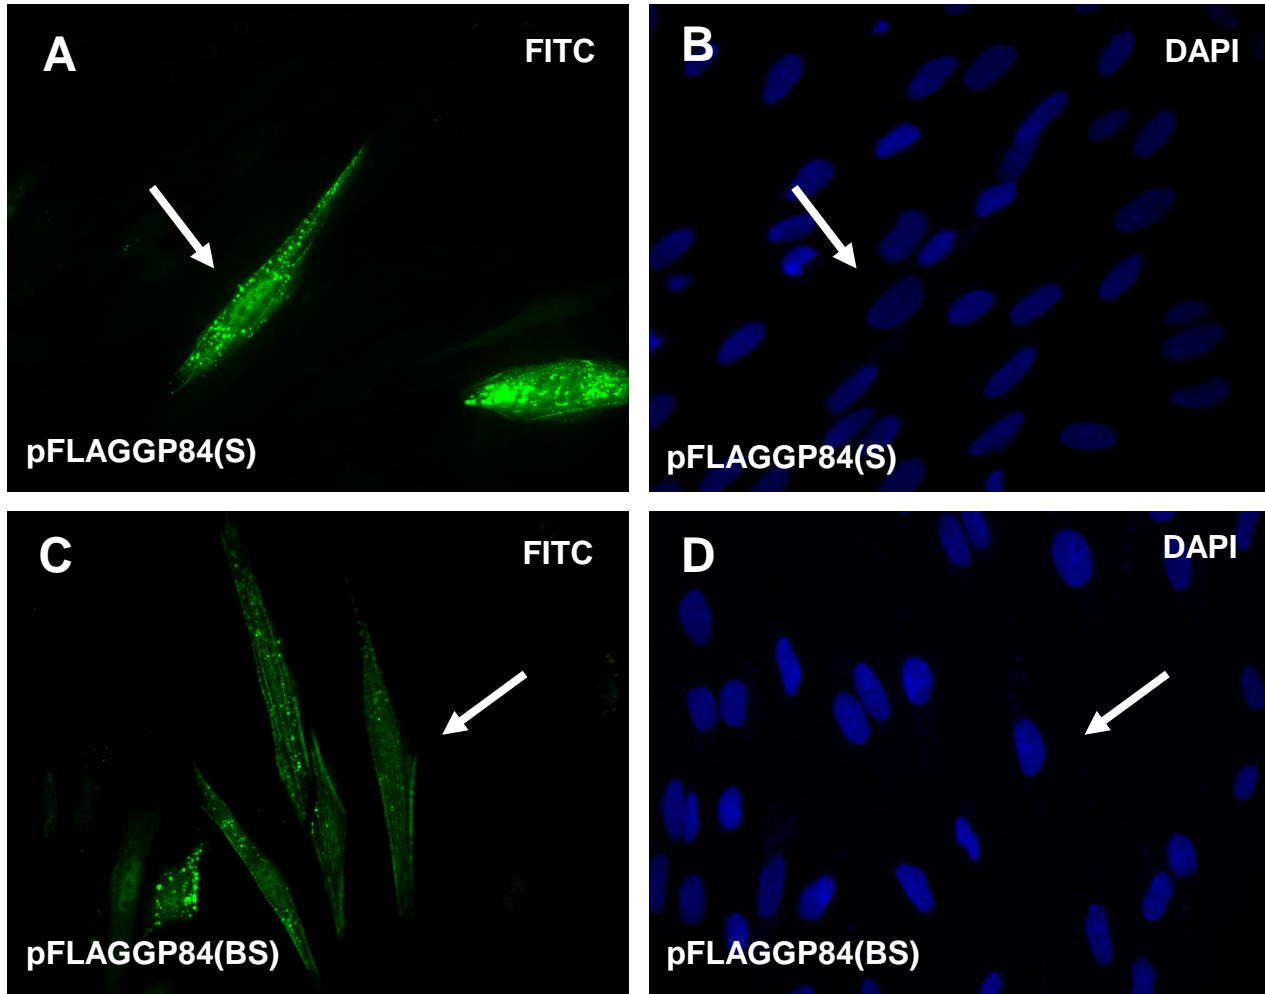

Supplementary Figure S3
